# 1 Moderate ART resistance mutations with low fitness cost in malaria parasites from 2 Africa

3 Hannah Michaela Behrens<sup>1#</sup>, Sabine Schmidt<sup>1#</sup>, Domitille Peigney<sup>1</sup>, Jürgen May<sup>2,3</sup>, Oumou Maïga-  
4 Ascofare<sup>2,3</sup>, Tobias Spielmann<sup>1\*</sup>

5

6 <sup>1</sup>Malaria Cell Biology, Molecular Biology and Immunology, *Bernhard Nocht Institute for Tropical  
7 Medicine, Bernhard-Nocht-Str. 74, 20359 Hamburg, Germany.*

8 <sup>2</sup>Infectious Disease Epidemiology Department, Epidemiology and Diagnostics, *Bernhard Nocht  
9 Institute for Tropical Medicine, Bernhard-Nocht-Str. 74, 20359 Hamburg, Germany.*

10 <sup>3</sup>German Centre for Infection Research (DZIF), Partner Site Hamburg-Luebeck-Borstel-Riems,  
11 Hamburg, Germany

12 #equal contribution,

13 \*corresponding author

14

## 15 Abstract

16 Combination therapies containing Artemisinin derivatives (ART) are the first line treatment of malaria  
17 but their effectiveness is reduced by resistance due to a fraction of ring stage *Plasmodium* parasites  
18 surviving high ART levels. Resistance-causing *kelch13* (*k13*) mutations are common in South East Asia  
19 but were only recently and sparsely detected in Africa, which experiences the highest malaria burden.  
20 Kelch13 shares a cellular compartment with other proteins (KICs) several of which cause resistance  
21 when inactivated or, in a few cases, when mutated. To see if the sparse detection of resistance  
22 mutations in Africa is due to unknown mutations, we tested 135 *k13* and *kic* mutations detected mostly  
23 in African field isolates. No *kic* mutation caused resistance but two in *k13*, V520A and V589I, did. These  
24 mutations were geographically much more widespread in Africa but conferred lower levels of  
25 resistance than known ART resistance mutations. A dissection of the mechanism using isogenic  
26 parasites with different *k13* mutations and parasites that we selected for even higher ART resistance,  
27 showed that resistance is a function of K13 protein levels in ring-stage parasites and correlates with  
28 the fitness cost. This indicated that hyper-resistance is unlikely to arise in the field. Double mutations  
29 in *k13* had not even additive effects and combinations including a non-*k13* mutation led to high fitness  
30 costs, suggesting that such combinations also pose no risk for higher resistance in the field. Overall,  
31 our results indicate that resistance is restricted by a proportional fitness cost but that incidence-  
32 lowering measures may favor high-resistance mutations.

## 33 Significance:

34 Our findings indicate that hyper-resistant parasites are unlikely to occur in endemic settings due to the  
35 proportional fitness cost. Mutations within *k13* were not additive and mutations outside *k13* had a  
36 disproportionately high fitness cost. The strong influence of the fitness cost may have favored moderate  
37 frequencies of the resistance mutations with low fitness cost detected in many African settings that  
38 we characterized in this study. These mutations, so far gone unnoticed, may be optimal in high  
39 endemicity regions, where relative drug use is presumably low but frequent multiple infections  
40 increase competition. A given endemic setting may thus favor variants with K13 levels for an optimal  
41 resistance-fitness balance which is relevant for incidence-lowering interventions.

## 42 Introduction

43 Malaria kills approximately half a million people per year, most of them children in sub-Saharan Africa  
44 (1, 2). Treatment heavily relies on artemisinin and its derivatives (ARTs) which are typically used in  
45 combination therapies (ACTs) with a partner drug (3). More than 10 years ago resistance to artemisinin  
46 was observed in low malaria incidence settings such as Asia, Oceania and South America. Resistance  
47 manifests as delayed parasite clearance after treatment, caused by some ring stage parasites surviving  
48 the ART-pulse, which is brief (1-2h) because of the low half-life of ART drugs. *In vitro* this resistance is  
49 measured by the ring stage survival assay (RSA) where survival of >1% of parasites indicates resistance  
50 (4).

51 The main cause of ART resistance are mutations in the *Pfkelch13* gene (*k13*) encoding the K13 protein  
52 (5, 6), which was recently found to be involved in endocytosis of host cell cytosol in the ring stage of  
53 the parasite (7). Ten mutations affecting the C-terminal propeller domain of K13 are confirmed to  
54 cause resistance as evident from delayed clearance (F446I, N458Y, M476I, Y493H, R539T, I543T, P553L,  
55 R561H, P574L, C580Y) and others have been associated with resistance (3).

56 Several other proteins, mostly from the K13-compartment, confer ART resistance in RSA either when  
57 downregulated or when mutated (7–11). Their contribution to resistance in the field is largely  
58 unknown.

59 Resistant clinical isolates and laboratory parasites carrying the resistance-associated mutations *k13*  
60 R539T and *k13* C580Y contain reduced amounts of K13 (7, 12–14). Artificially modulating K13 levels  
61 indicated that the reduced K13 levels lead to resistance (7, 12, 15). However, the impact of mutations  
62 on K13 levels and the relationship to resistance has not been systematically analysed and it is unclear  
63 whether other *k13* mutations confer resistance through the same mechanism or affect the  
64 functionality of K13.

65 While ART-resistance mutations are frequent in South East Asia, up to 100% in some locations (16–18),  
66 they are rare in Africa (17, 19, 20). Six validated resistance-conferring *k13* mutations (M476I, P553L,  
67 R561H, P574L, C580Y and A675V) have occasionally been reported in African countries at moderate to  
68 low frequency of 4.1% or less (21–23). Two exceptions are the R561H mutation in Rwanda, which was  
69 reported more frequently since 2019, most recently up to 16% (24–26) and the 11% of A675V mutation  
70 in Uganda in 2019 (23). It is not clear whether further resistance mutations exist in Africa that have not  
71 been studied yet because most studies focused on mutations occurring in Asia and systematic *k13*  
72 surveillance is still lacking in Africa. In agreement with the rare occurrence of resistance mutations,  
73 treatment failure occurs at less than 1% in Africa (27), with the exception of the Masaka region in  
74 Rwanda at 16%, where *k13* R561H occurs (26). However, a high proportion of immunity and the high  
75 multiplicity of infections in the African population might hamper parasites surviving ART treatment in  
76 patients (28, 29).

77 The reduced endocytosis in ART resistant parasites results in an amino acid deprivation (30) and there  
78 is clear evidence for a fitness cost of ART resistance (6, 31). Usually considerably less than 50% of  
79 parasites from resistant patient isolates survive in the RSA (5) and the delayed clearance rather than  
80 full loss of susceptibility in patients could indicate that parasites with higher levels of ART resistance  
81 might arise. However, it is at present unclear if and to what extent the fitness cost impedes higher  
82 levels of resistance in endemic areas. It is also unclear if combinations of mutations could lead to hyper-  
83 resistant parasites.

84 Here we report that two *k13* mutations which are present in parasites from several African countries  
85 (32, 33) afford moderate but significant resistance to ART. We show that these mutations incur a much  
86 smaller fitness cost than the C580Y mutation, the most common mutation in South East Asia. A

87 comparison of parasites with these and other mutations shows a correlation between resistance,  
88 fitness cost and K13 protein abundance of a given variant, suggesting a strong constraint of resistance  
89 levels by the fitness cost. This was confirmed by parasites artificially selected for higher resistance.  
90 High endemicity settings, typical for many African regions, are characterized by frequent multiple  
91 infections and likely infrequent ACT use due to partial immunity (34–36). Our work raises the possibility  
92 that this resulted in a selection pressure favoring low level resistance to ART and that this may be a  
93 reason for the differences in the geographic distribution of *k13*-mutations. This may be of relevance  
94 for interventions reducing malaria burden. Our results also indicate that the fitness cost may prevent  
95 the occurrence of hyper-resistant parasites with the K13-based mechanism unless other changes  
96 evolve in the parasite that counter act the fitness cost. Finally, we find no evidence for increased  
97 resistance in parasites with double mutations or mutations outside *k13* and these may therefore not  
98 pose a threat for hyper-resistance.

## 99 Results

### 100 Low-prevalence *k13* mutations found in Africa cause ART resistance

101 We hypothesized that in a holoendemic region such as Africa mutations causing resistance could only  
102 be present at low to moderate prevalences (< 5%) or confer only limited resistance as otherwise wide-  
103 spread treatment failure would already have been observed. In addition, we took into consideration  
104 that not only *k13*, but also genes of K13 compartment proteins such as *ubp1* could be mutated. We  
105 therefore decided to analyze non-synonymous mutations in *k13* and genes of other K13 compartment  
106 proteins with low to medium prevalence in patient samples from Africa based on the data available  
107 from WWARN (37), the Ghanaian Fever Without Source study (38) and MalariaGen (39). These  
108 included mutations in the genes encoding K13, KIC1, KIC2, KIC4, KIC5, KIC7, KIC9, UBP1, EPS15, AP-2 $\alpha$   
109 and MyoF (previously annotated as MyoC) (list of mutations in Table S1). Due to the large number of  
110 mutations in the K13 compartment proteins (a total of 131 mutations in ten genes) we created  
111 mutation pools by simultaneously introducing several mutations into the same gene in 3D7 parasites  
112 using selection-linked integration (SLI, (40)) (Table S1). In total 125 mutations were included in 8  
113 mutation pools and 6 mutations were tested individually. RSAs (using dihydroartemisinin (DHA)) with  
114 the parasites harboring the pools of mutations in compartment members of K13, showed no change  
115 in susceptibility to ART, suggesting that none of the mutations in the genes encoding KIC1, KIC2, KIC4,  
116 KIC5, KIC7, KIC9, UBP1, EPS15, AP-2 $\alpha$  and MyoF resulted in ART resistance (Figure 1A and Figure S1).

117 For *k13* itself we chose the mutations V520A, V589I and E612K that have been found with low to  
118 moderate prevalence in different malaria endemic regions in Africa and were not previously tested for  
119 ART resistance *in vitro* (32, 33, 41). E612K was found only in Cameroon with a prevalence of 0.8% in  
120 2016. The prevalence of the other mutations was between 1.3% in Ghana in 2012 and 4.0% in the  
121 Democratic Republic of Congo in 2007 for V520A, and between 0.3% and 5.0% in Equatorial Guinea for  
122 V589I in 2018 and 2013, respectively (Figure 1B and Dataset S1). All samples analyzed in the 35 studies  
123 that detected these three mutations were taken after ACT started to be used in the respective country,  
124 with exception of one study in Kenya in 2002 (Dataset S1).

125 The respective mutations were introduced into the *k13* locus of *P. falciparum* 3D7 parasites together  
126 with GFP to result in a GFP-K13 fusion as done previously (7) and the susceptibility to ART was tested  
127 by RSA. *k13* V520A resulted in 1.1% ( $\pm 0.4\%$ ) mean survival and V589I in 1.9% ( $\pm 1.2\%$ ) mean survival,  
128 therefore both were above the threshold for resistance (1% survival (42)), whereas E612K (0.6% mean  
129 survival) did not render parasites resistant to ART (Figure 1C). This is in agreement with previous  
130 observations that mutations conferring resistance to ART occur in the K13 propeller domain but not in  
131 the fourth and fifth blade (residues 581 to 666) of this propeller (43). In conclusion, *k13* mutations

132 resulting in moderate ART-resistance when tested in a laboratory isolate are widespread on the African  
133 continent at moderate to low prevalence.

134 For comparison, we also tested *k13* C580Y, R561H and R539T, which were previously shown to be  
135 resistance mutations and *k13* E252Q, which occurred in Thailand and Myanmar between 2005 and  
136 2013 where it was previously associated with slow clearance but not tested *in vitro*. This latter  
137 mutation was also of interest because it is not in the Kelch propeller domain. Similar to V520A and  
138 V589I, E252Q conferred a moderate level of resistance in RSA (1.0% ( $\pm 0.6\%$ )), while the known  
139 resistance mutations C580Y (16.3%  $\pm 6.1\%$ ), R561H (11.1%  $\pm 8.0\%$ ) and R539T (38.4%  $\pm 13.2\%$ ) showed  
140 higher proportions of surviving parasites (Figure 1C), similar to what was previously observed for C580Y  
141 and R539T in 3D7 (5). E252Q is unusual in that it confers resistance despite being situated in the N-  
142 terminal domains of K13 instead of its propeller domain. Of note, a non-propeller domain mutation,  
143 *k13* P413A, was recently found to also confer resistance but this mutation is located in the BTB/POZ  
144 domain that in contrast to the region of the E252Q mutation is still part of K13 conserved with proteins  
145 in other organisms (44).

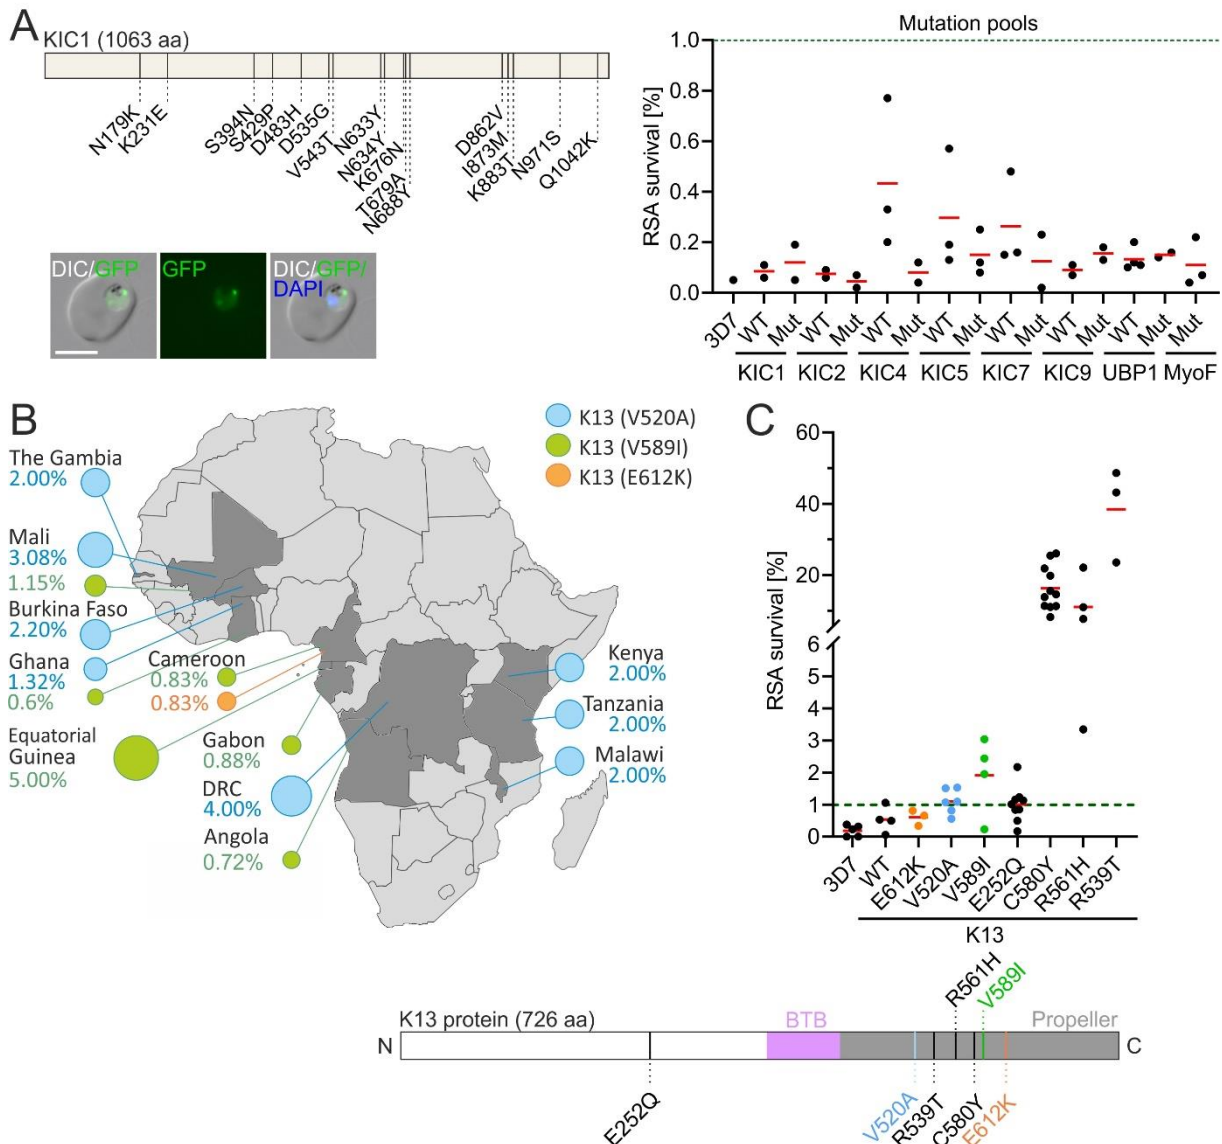

146 **Figure 1: Low prevalence mutations cause moderate levels of ART resistance.** (A) Mutations introduced in the mutation  
147 pool of KIC1 are exemplarily shown in a schematic and fluorescence images of the resulting parasites harboring KIC1 with all  
148 pool mutations are shown. Scale bar 5  $\mu$ m. RSA survival for all mutation pools is displayed (% survival compared to control  
149 without DHA 6 h after 6 h DHA treatment in standard RSA). (B) Map of Africa illustrating geographical distribution of  
150 mutations and corresponding prevalence. Highest mutation frequency detected in each country is shown. Circle area is  
151



152 proportional to prevalence. DRC, Democratic Republic of the Congo. (C) RSA of different K13 mutant cell lines. WT, wild  
 153 type; red bars indicate the mean parasite survival rate of the respective cell line, each dot represents an independent  
 154 experiment, green dashed line represents the 1% cut-off value defining parasites resistant to ART. Position of *k13* mutations  
 155 is shown on K13.

156  
 157

### 158 Double mutations in *k13* do not significantly increase ART resistance

159 To anticipate how *k13* resistance phenotypes could further develop in endemic areas, we investigated  
 160 whether the combination of the *k13* C580Y mutation (which is highly prevalent in SE Asia) with the  
 161 newly identified low-resistance mutation V520A or the known high-resistance mutation R539T poses  
 162 the risk of hyper-resistance. To obtain the corresponding cell lines, we again modified the endogenous  
 163 *kelch13* locus of 3D7 parasites using SLI so that the double mutated K13 was also fused to GFP. The  
 164 K13<sup>V520A+C580Y</sup> parasites did not display an increased resistance level in RSAs compared with parasites  
 165 with only the C580Y mutation (16.3% mean survival) but showed a non-significant decrease (11.5%  
 166 survival) (Figure 2A). Similarly, K13<sup>R539T+C580Y</sup> parasites showed non-significantly decreased RSA survival  
 167 (33% survival) compared with parasites with R539T alone (38% survival) but significantly more survival  
 168 than the C580Y alone. In conclusion, the combination of a low- and a high-resistance mutation or two  
 169 high-resistance mutations—at least with the tested mutations—is neither additive nor synergistic.

170

### 171 Selection by consecutive RSAs significantly increases ART resistance

172 In a further attempt to anticipate increased resistance, we tested whether resistant parasites can be  
 173 selected for increased resistance by performing consecutive RSAs. For this, an RSA was carried out with  
 174 K13<sup>C580Y</sup> parasites and surviving parasites were subjected to another RSA as soon as they reached  
 175 sufficient parasitemia following the previous RSA (Figure 2B). After 29 iterations of RSAs, we obtained  
 176 the parasite line K13<sup>C580Y</sup>-29<sup>th</sup>. These parasites displayed significantly increased survival in RSA (39.2%  
 177 mean survival) compared with the original K13<sup>C580Y</sup> parasites at the start of this experiment (12.4%  
 178 mean survival) (Figure 2C), showing that repeated ART-treatment of *k13* C580Y-harbouring parasites  
 179 can increase ART resistance. Sequencing of *k13* in these parasites showed that this was not due to  
 180 additional *k13* mutations apart from C580Y.

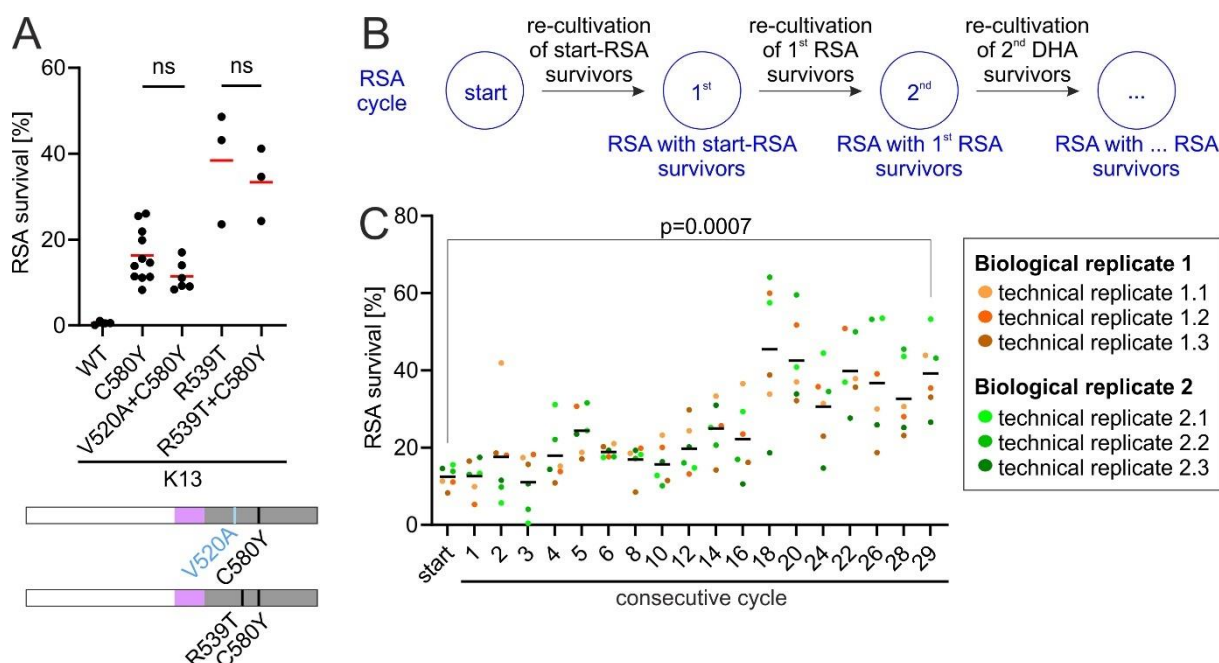

181

182 **Figure 2: DHA-selection but not combination of low and high resistance mutations increases resistance.** (A) RSA of the  
183 different *k13* mutant cell lines indicated. WT, wild type; each point represents an independent RSA; red bars indicate the  
184 mean parasite survival rate of the respective cell line. Position of *k13* mutations are shown on K13. Domains are colored as  
185 in figure 1. (B) Scheme of experimental procedure of consecutive standard RSA cycles performed with DHA survivors of the  
186 respective prior cycle. (C) Parasite survival rate of K13<sup>C580Y</sup> (% survival compared to control without DHA) 66 h after 6 h DHA  
187 treatment in standard RSA. Six experiments per cycle were performed, consisting of two biological and three technical  
188 replicates (see color code). P value is indicated, two-tailed Student's t-test. Red bars show mean.

189

## 190 Cellular levels of K13 and KIC7 determine ART-resistance

191 Previously, we and others showed that the level of K13 in the K13<sup>C580Y</sup> parasites is lower than in K13<sup>wt</sup>  
192 parasites and that reducing K13 abundance resulted in resistance (7, 12). We therefore assessed the  
193 cellular K13 levels in the parasites with the V520A and V589I mutations. We previously used either  
194 Western blots or direct microscopy-based measurement of GFP fluorescence in the cells to determine  
195 K13 levels (7). Here we used direct microscopy-based measurement of K13 levels because in  
196 comparison to Western blots, which are only semi-quantitative, this procedure is not susceptible to  
197 influence of cell lysis and the multiple steps required for blotting and detection. These experiments  
198 showed that the level of K13 with the V520A mutation was 94% of WT K13 level and K13 with V589I  
199 was 92% of WT (Figure 3A). This reduction in protein levels was more modest than observed for the  
200 high-resistance mutations *k13* C580Y, *k13* R561H and *k13* R539T which showed 52%, 51% and 51%  
201 compared with WT, respectively (Figure 3A). As expected from their RSA resistance behavior, parasites  
202 with the *k13* V520A C580Y double mutation harbored similar levels of K13 as parasites with the *k13*  
203 C580Y alone (48% of WT), while the K13 levels in K13<sup>C580Y-29<sup>th</sup></sup> parasites showed a further reduction  
204 (32% of WT) when compared with K13<sup>C580Y</sup> parasites (Figure 3A and S2). The E252Q mutation showed  
205 no reduction (105% of WT). Differences between WT and K13 harboring R561H, R539T or C580Y with  
206 or without other mutations were significant comparing the means (Figure 3A) or individual values  
207 (Figure S2). Given the small differences between WT and V520A, V589I or E252Q, obtaining statistically  
208 backed results would be difficult, but it can be concluded that there is either a small or no reduction  
209 of the abundance of V520A and V589I variants in in the cell.

210 We noted that high resistance mutations had low K13 levels and low resistance mutations had high  
211 K13 levels. To better explore this relationship, we plotted the cellular K13 levels against RSA survival  
212 (resistance) and found that cellular K13 levels correlated with resistance (Pearson's  $r=-0.81$ ,  $p=0.005$ )  
213 (Figure 3B). The mutations clustered in two groups, one high resistance-low K13 levels group, including  
214 the C580Y mutation and a low resistance-high K13 levels group, including the V520A and V589I  
215 mutations.

216 To test whether RSA-resistance not just correlates with but is determined by the amount of K13 in its  
217 cellular location, we used K13 1xNLS parasites (7). In this line K13 protein is removed into the nucleus  
218 by a nuclear localization signal (NLS) upon addition of rapalog, resulting in a knock sideways. Previously,  
219 250 nM rapalog was used to achieve a knock sideways of K13 (40). Here, we used different  
220 concentrations of rapalog to result in different levels of K13 protein remaining at its site of action. ART-  
221 resistance as measured by RSA increased as the rapalog concentration and hence K13 knock sideways  
222 increased, confirming that RSA-survival is a function of K13 levels in the parasites (Figure 3C). These  
223 results confirm observations made on parasites in which the K13 abundance was titrated on mRNA  
224 level through the glmS system and determined RSA survival rates (15). We performed a second  
225 titration on KIC7, a K13-compartment protein, which was also mislocalized using the same increasing  
226 rapalog concentrations as for K13 (Figure 3D). Again, RSA survival was dependent on the level of knock  
227 sideways of KIC7 (i.e. amount of KIC7 at the K13 compartment), indicating that the activity of the

228 endocytic process determines resistance and that this occurs through the available amount of the  
 229 proteins involved in this process.

230

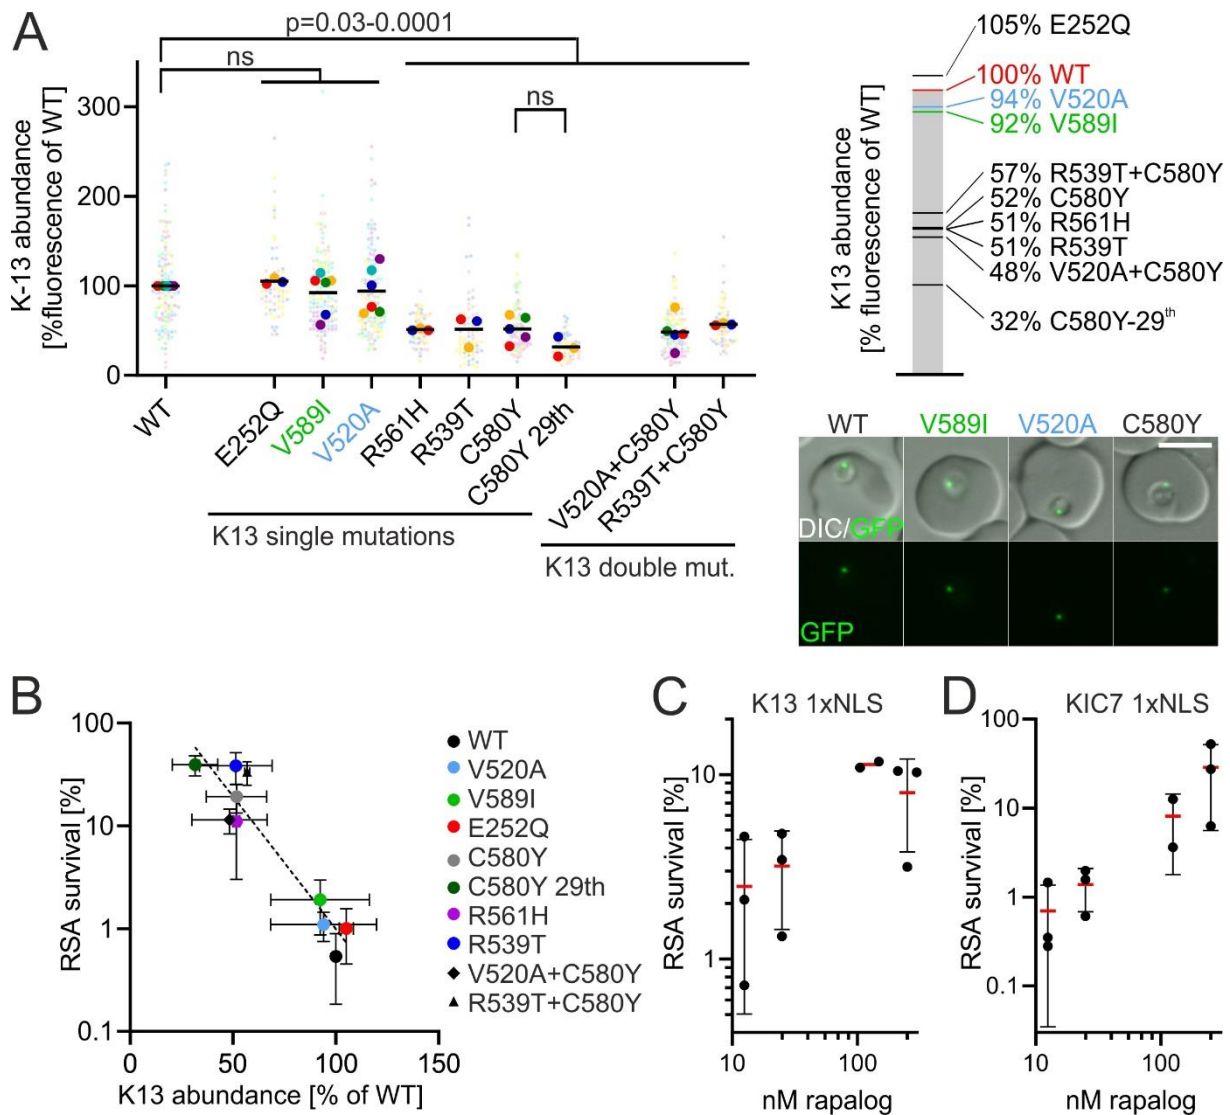

231

232 **Figure 3: Resistance is inversely correlated with K13- and KIC7-abundance.** (A) K13-abundance measured by the GFP  
 233 fluorescence intensity of the single focus observed in ring stage parasites with the indicated K13 expressed from the  
 234 endogenous locus and fused to GFP, normalized to the fluorescence in parasites with the identically modified endogenous  
 235 locus but with a WT GFP-K13. Each small dot represents the measured value from one focus in one parasite. Large dots of  
 236 the same color as small dots represent mean of the respective measured values and each large dot represents one  
 237 biological replicate. P-values derive from comparing means by one-way ANOVA. Example fluorescence microscopy images  
 238 are shown. Scale bar 5  $\mu$ m. (B) Mean of parasite survival in standard RSA plotted against mean of K13-abundance. Error  
 239 bars show standard deviations. (C) RSA survival of K13 1xNLS parasites grown in the presence of 12.5 nM, 25 nM, 125 nM or  
 240 250 nM rapalog for 3 h before and 6 h during the DHA exposure of the RSA. (D) RSA survival of KIC7 1xNLS parasites grown  
 241 in the presence of 12.5 nM, 25 nM, 125 nM or 250 nM rapalog for 3h before and 6h during the DHA exposure of the RSA.  
 242 Red bar, mean; standard deviation indicated; each dot derives from an independent experiment.

243

#### 244 Fitness cost correlates with ART-resistance

245 In contrast to parasites harboring C580Y, parasites with *k13* V520A and V589I mutations are prevalent  
 246 in Sub-Saharan African countries, with particularly V520A showing a wide distribution (Figure 1B). This

247 raises the question whether high malaria prevalence, such as in Sub-Saharan Africa, favors parasites  
248 with a low resistance (compared with high resistance) due to a lower fitness cost of these mutations if  
249 no drug pressure is applied. Fitness cost might be critical in Africa because of the additional selection  
250 pressure from within-host competition which in turn results from high multiplicities of infections (36)  
251 and because of partial-immunity of the human population which might result in lower relative ART  
252 usage in the infected population (36). Several studies modelling fitness and within-host competition  
253 have highlighted the importance of fitness cost and propose that resistant parasites with high fitness  
254 cost are less likely to establish themselves in high transmission areas like Africa (29, 45, 46). Yet  
255 resistance mutations that confer low resistance and low fitness costs have not been considered in this  
256 context.

257 To measure fitness of the *k13* mutants, we first monitored *in vitro* growth after 96 h. K13<sup>V520A</sup> and  
258 K13<sup>V589I</sup> parasites showed no significant growth defect compared to K13<sup>WT</sup> (Figure 4A). In comparison,  
259 parasites harboring the C580Y mutation showed a significant growth defect as described before (18).  
260 When RSA survival was plotted against growth for each of the parasite lines with different *k13*  
261 mutations, the parasite lines clustered into two groups: one with low fitness and high resistance (all  
262 parasites harboring the *k13* C580Y mutation) and one with high fitness and low resistance (*k13* V520A  
263 and V589I), possibly reflecting different selection pressures in the different transmission settings  
264 (Figure 4B).

265 Previously, fitness costs of *k13* mutations have been measured by observing the growth of a mixed  
266 culture of a mutant and a parent parasite line (18, 47). To further investigate the fitness costs of the  
267 newly detected resistance mutations *k13* V520A and *k13* V589I the respective parasites were mixed  
268 1:1 with 3D7 parasites and the proportion of mutated parasites was tracked until it made up less than  
269 5% of the parasite population (Figure 4C and S3). For comparison, the same experiment was performed  
270 with K13<sup>C580Y</sup>, K13<sup>C580Y-29<sup>th</sup></sup> and K13<sup>E252Q</sup> parasites. Similar to what was observed when parasites growth  
271 was tracked in individual cultures, there was a trend that the RSA-survival caused by a mutation  
272 correlated with the fitness cost it inflicted (Figure 4D). However, this trend was not significant  
273 (Pearson's  $r=0.69$ ,  $p=0.13$ ) because *k13* V520A behaved as an outlier to the trend in half of the  
274 experimental repeats, in which its growth slowed severely after the start of the experiment (Figure  
275 S3), while in the other half it grew as expected from the trend of the other mutations (Pearson's  $r=0.90$ ,  
276  $p=0.04$  when V520A was excluded) (Figure 4C). It is unclear why the *k13* V520A cell line grew much  
277 less than expected in some experiments but it is possible that independent factors impaired the growth  
278 of these parasites or that this mutation has effects differing from the other mutations but that these  
279 effects are not relevant at all times.

280 In conclusion, the level of ART-resistance a *k13* mutation causes correlates with its fitness cost (Figure  
281 4A-D). Together with the findings on K13 abundance (Figure 3), it is therefore likely that both fitness  
282 cost and ART-resistance are caused by the reduced amount of K13 in the cell as a result of the  
283 destabilization of the K13 protein through the given mutation.



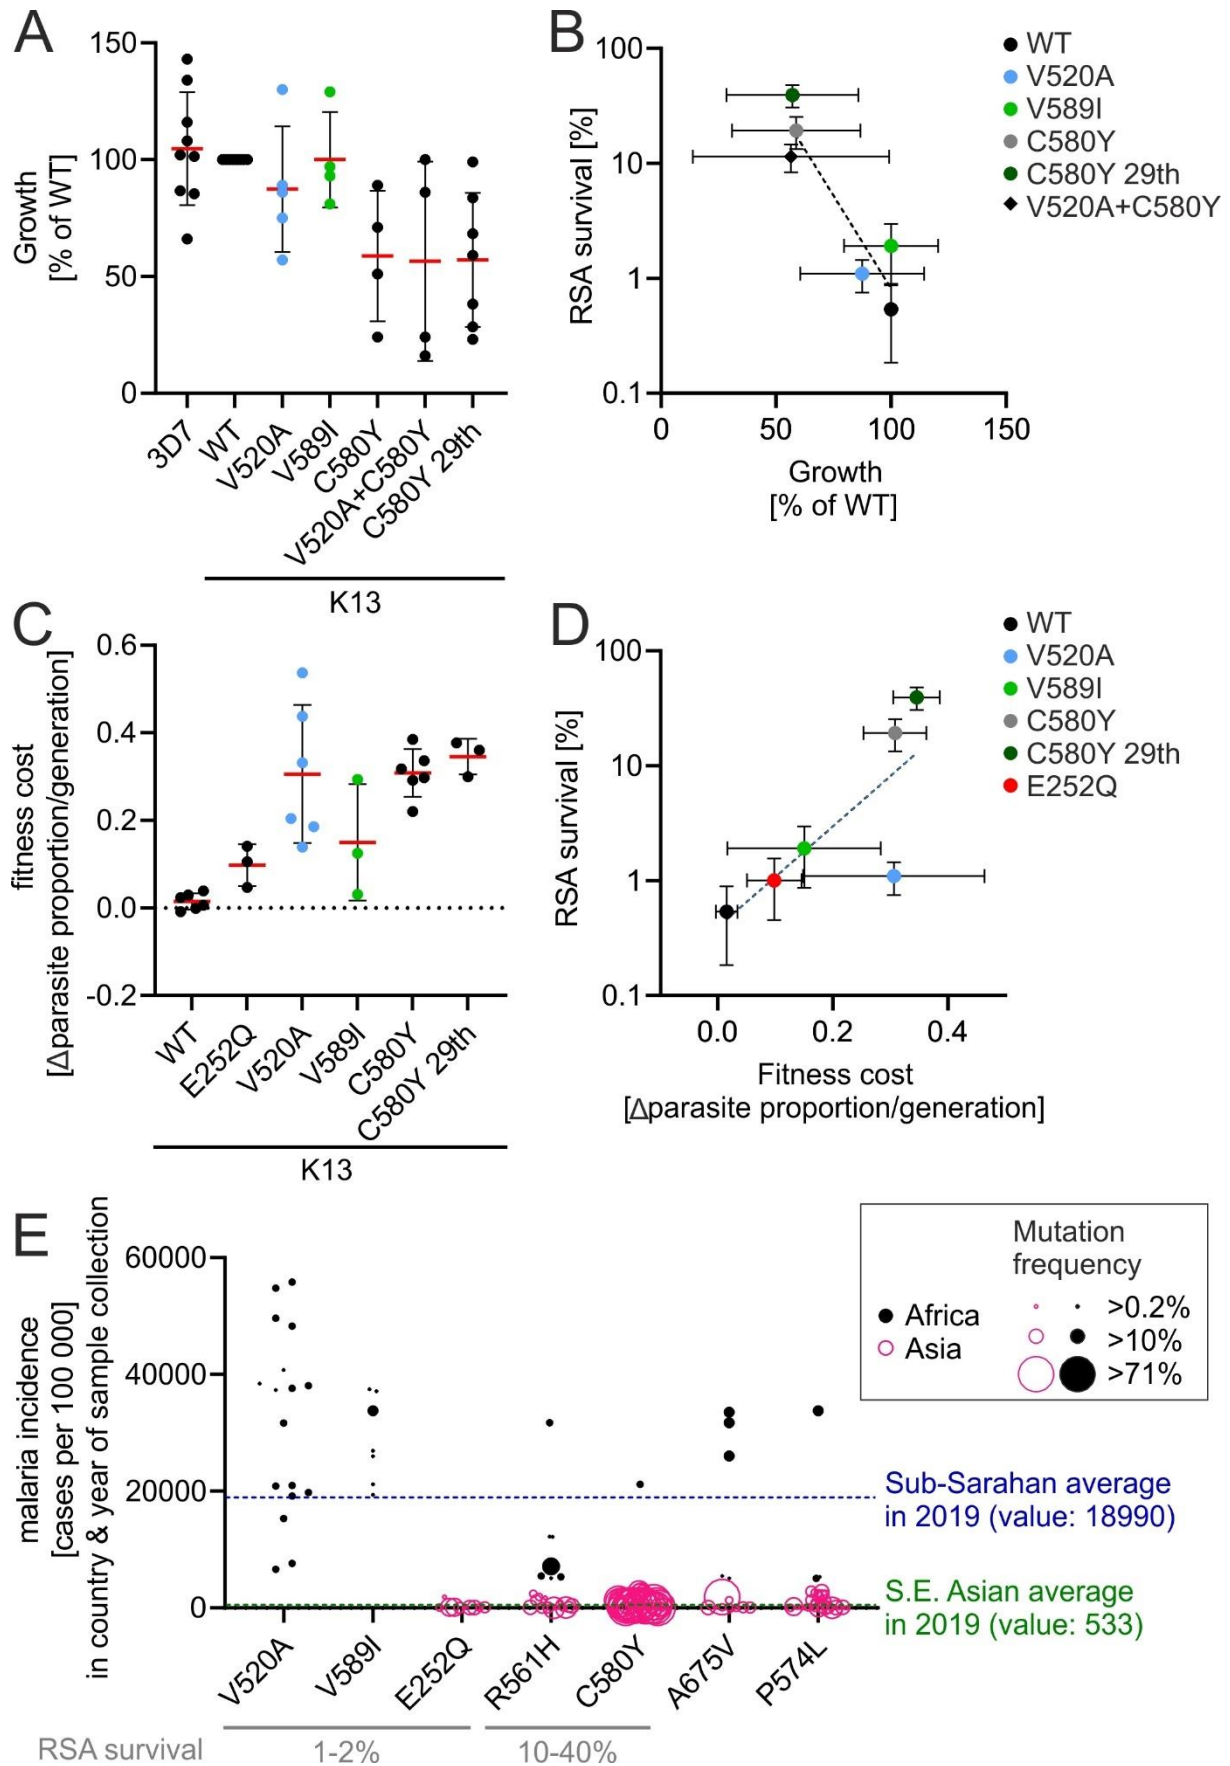

284

285

286

287

288

**Figure 4 Fitness cost correlates with resistance:** (A) Parasite growth, calculated as fold-change of parasitemia after 96 h compared to parasitemia at 0 h, normalized to WT growth for different cell lines with indicated *k13* mutations. (B) Mean of growth of strains harboring different *k13* mutations plotted against mean of parasite survival in RSA. Dashed line shows linear regression against log-transformed data. (C) Fitness cost of parasites harboring different *k13* mutations grown in competition

289 with 3D7 parasites given as loss of parasite proportion/generation. (D) Mean of fitness cost plotted against mean of parasite  
290 survival in RSA. All error bars show standard deviations. Black dashed line shows linear regression against log-transformed  
291 data. (E) Malaria incidence at place and time of *k13* resistance mutation detection. RSA survival shown as determined in this  
292 work (Figure 1B).

293 Following the hypothesis that the lower fitness cost of low-resistance mutations might be an  
294 advantage in areas with high malaria incidence because of the higher in-host competition and lower  
295 treatment frequency in the infected population, we compared the malaria incidence at which the  
296 different *k13* mutations occurred in Africa (black, Figure 4E, Dataset S2). As there is no continuous  
297 monitoring of *k13* mutations in most African countries, the comparison relied on individual studies  
298 that were conducted at different times and places (data from WWARN (48)). For each detection of a  
299 *k13* resistance mutation on the African continent, the malaria incidence in that country and year was  
300 plotted (data from IHME Burden Of Disease (49)). For comparison the occurrence of the same  
301 mutations in Asia was also added (pink, Figure 4E). For instance, *k13* V520A was detected in 17 studied  
302 populations in countries that had malaria incidences ranging from 6604 to 55829 malaria cases per  
303 100000 inhabitants in the year of the detection of this mutation. The frequency of the V520A mutation  
304 among all sequenced samples ranged from 1.3% to 2.5% (circle area, Figure 4E). Like *k13* V520A, *k13*  
305 V589I was only detected in Africa. The other *k13* resistance mutations that were detected in Africa also  
306 occurred in Asia. Overall, the low-resistance mutations *k13* V520A and V589I occurred in regions with  
307 higher malaria incidence than the high resistance mutations R561H and C580Y (Figure 4E) and were  
308 detected in more study populations (Figure 4E) and in a wider geographical range than R561H and  
309 C580Y (Figure 1B). *k13* A675V and P574L were detected in low and high incidence areas, but their  
310 resistance level cannot be compared because it was not tested in isogenic backgrounds. E252Q was  
311 only detected in Asia, with all but one occurrence in Thailand where its frequency decreased as malaria  
312 incidence dropped (Figure S4). At the same time the frequency of C580Y increased, which supports  
313 that the high resistance mutation C580Y has a competitive advantage at low malaria incidence.  
314 Nonetheless, it is surprising that E252Q has not been observed in places with higher malaria incidence  
315 in Africa but this might be because often only the propeller domain is sequenced when screening for  
316 resistance mutations (Figure 4E).

### 317 ***ubp1* R3138H increases fitness cost but not ART resistance in *K13*<sup>C580Y</sup> parasites**

318 After assessing the effect of the *k13* double mutations V520A+C580Y and R539T+C580Y, we wondered  
319 whether there are combinations of mutations or gene disruptions beyond *k13* that harbour the risk of  
320 very high resistance levels. To test this we used parasites with *kic4* and *kic5* targeted gene disruptions  
321 (TGD), two lines previously shown to have increased parasite survival in RSA and a reduced growth (7).  
322 In addition we used parasites with the R3138H mutation in *ubp1* (encodes UBP1) which had been  
323 detected in patient isolates in SE Asia and confers moderate levels of ART-resistance in RSA (7, 50).

324 We aimed to generate three different parasite lines: parasites with *ubp1* R3138H and a disrupted *kic4*,  
325 parasites with *ubp1* R3138H and disrupted *kic5*, parasites with disrupted *kic4* and *kic5*. Six integration  
326 attempts using selection linked integration were done for each parasite line, with at least 14 weeks on  
327 the selection drug or until parasites reached at least 0.1% parasitemia, but no parasite lines with  
328 correct integration were obtained. Additionally, three attempts were made to generate the *kic4+kic5*  
329 double disruption parasite line by the reverse approach of disrupting *kic4* in *kic5*-TGD parasites, instead  
330 of *kic5* in *kic4*-TGD parasites, with at least 11 weeks on the selection drug or until parasites reached at  
331 least 0.1% parasitemia. Again, no parasite lines with the correct integration were obtained. Failure to  
332 obtain these lines indicates that the fitness cost of these combinations of gene disruptions and  
333 mutations may have been too high for the parasites to survive. Based on this, it seems that double  
334 mutations including the disruption of *kic4* or *kic5* (and possibly other K13 compartment proteins

335 affecting endocytosis and resistance) are not likely to contribute to the development of higher ART-  
336 resistance in the field.

337 Finally, we investigated the possibility of *k13* mutations combined with mutations in other proteins by  
338 combining *k13* C580Y with *ubp1* R3138H. We successfully introduced this combination, yet the  
339 resulting K13<sup>C580Y</sup>+UBP1<sup>R3138H</sup> parasites did not display a significantly increased resistance level (17.3%  
340 mean survival) compared with parasites with the C580Y mutation alone (Figure 5A). As before (Figure  
341 3B), the K13 abundance correlated with ART resistance as measured by RSA survival (Figure 5B and C).  
342 The growth of K13<sup>C580Y</sup>+UBP1<sup>R3138H</sup> parasites was slower than that of K13<sup>C580Y</sup> parasites and UBP1<sup>R3138H</sup>  
343 parasites, which each confer a fitness cost, both when measured in individual cultures and direct  
344 competition assays (Figure 5D-G). Of particular note is that the *ubp1* R3138H mutation alone caused a  
345 disproportionately low growth compared to the level of ART resistance it affords when compared to all  
346 tested *k13* mutations (Figure 5E). This is congruent with our previous finding that in contrast to K13,  
347 UBP1 is also important for hemoglobin endocytosis in trophozoites (7) and could explain why we were  
348 not able to combine this mutation with *kic4* and *kic5* TGDs and why this mutation has rarely been  
349 observed in patient samples. Overall, due to its disproportionately high fitness cost and lacking  
350 synergism with *k13* mutations, *ubp1* R3138H and likely mutations in other K13 compartment proteins  
351 important for endocytosis in trophozoites are therefore not probable to combine with *k13* mutations  
352 in the field.

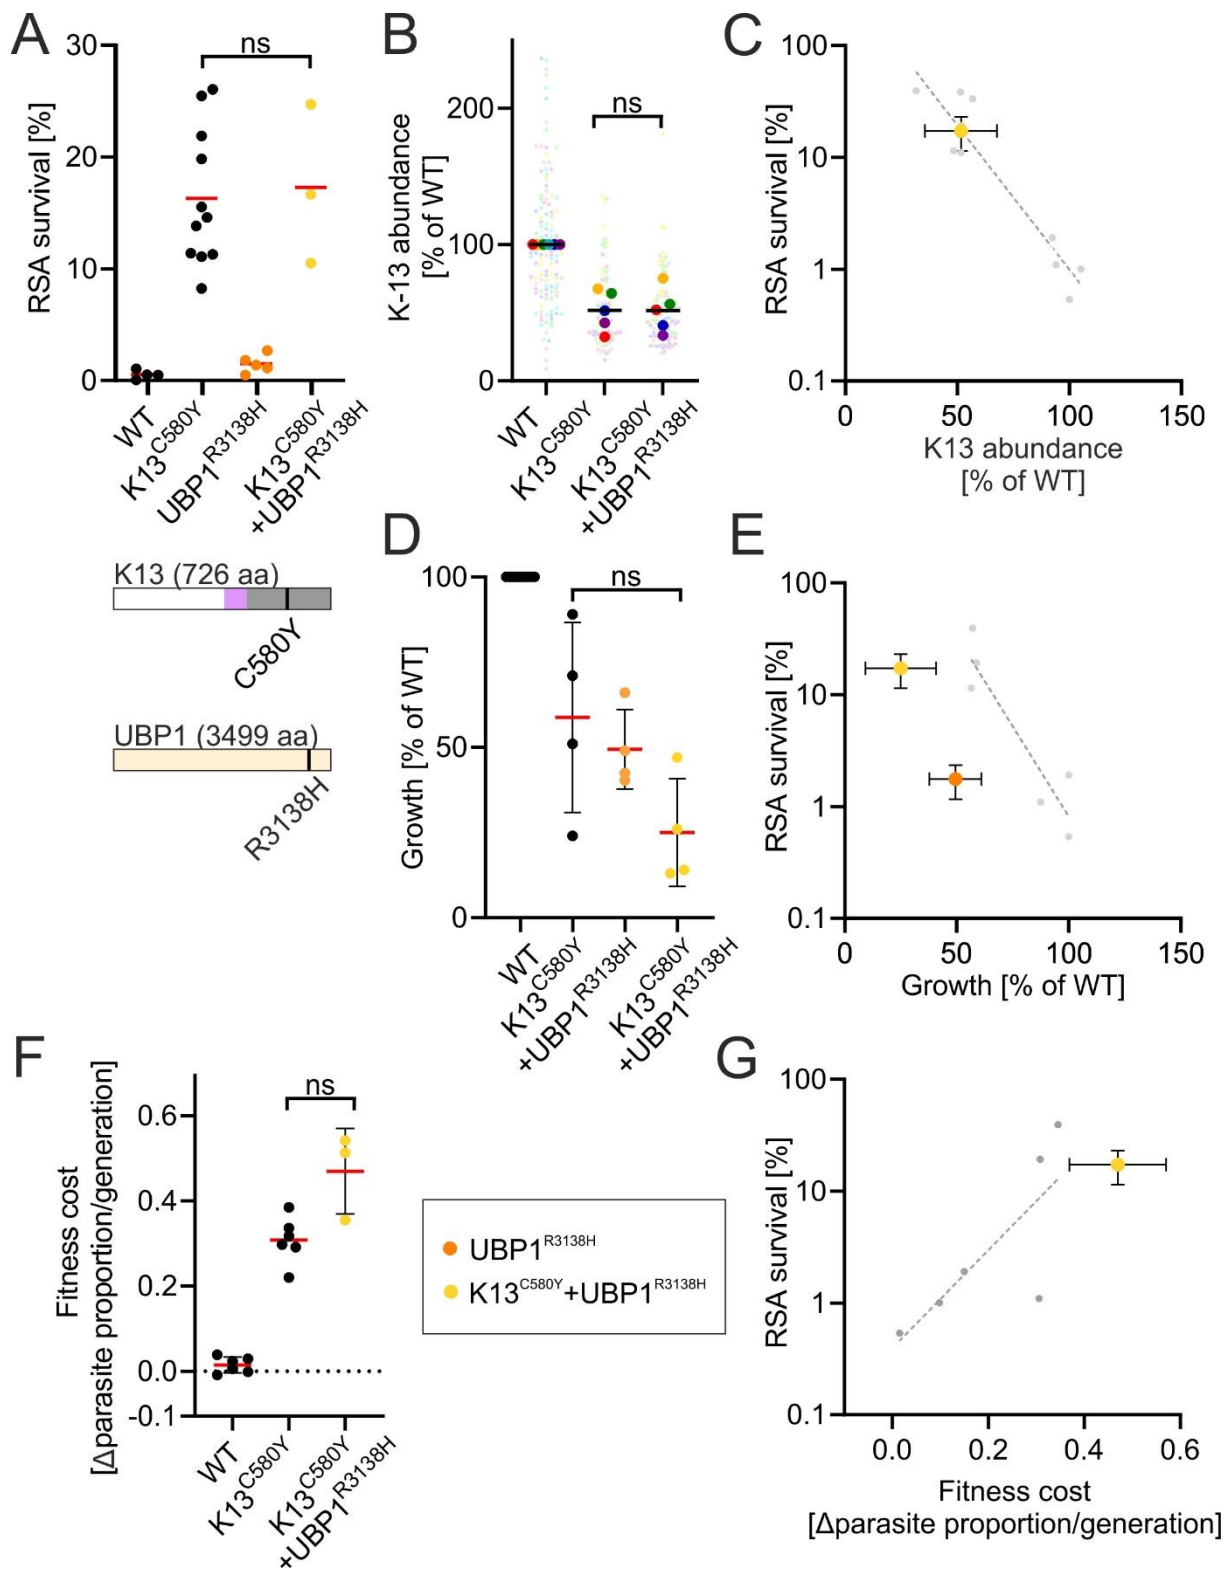

353

354 **Figure 5: Double mutation of *k13* C580Y and *ubp1* R3138H result in a high fitness cost.** (A) RSA of K13<sup>C580Y</sup> and UB1<sup>R3138H</sup>  
 355 single and double mutant cell lines. Red bars indicate the mean parasite survival rate of the respective cell line. Data for  
 356 UB1<sup>R3138H</sup> was previously published in (7). Position of *k13* and *ubp1* mutation is depicted in K13 and UB1. K13 domains are  
 357 colored as in figure 1. (B) K13-abundance measured GFP fluorescence intensity of the single focus observed in ring stage  
 358 parasites of the indicated K13 expressed from the endogenous locus and fused to GFP, normalized to the fluorescence in  
 359 parasites with the identically modified endogenous locus but with a WT GFP-K13. Small dots represent measured values for  
 360 individual parasites. Large dots of the same color as small dots represent mean of the respective measured values and each  
 361 large dot represents one biological replicate. Dots of the same color were obtained as part of the same experimental repeat.  
 362 (C) K13 abundance plotted against parasite survival in RSA for K13<sup>C580Y</sup> + UB1<sup>R3138H</sup> parasites (yellow). Grey dots show data of  
 363 *k13* mutations from Figure 3B. (D) Growth, calculated as fold-change of parasitemia after 96 h normalized compared to

364 parasitemia at 0 h for different cell lines with indicated *k13* or *ubp1* mutations. (E) Growth of strains harboring *ubp1* R3138H  
365 with (yellow) and without (orange) *k13* C580Y plotted against parasite survival in RSA. Grey dots show data of *k13* mutations  
366 from Figure 4B. (F) Fitness cost for different cell lines with indicated *k13* or *ubp1* mutations grown in mixed cultures with 3D7.  
367 (G) Fitness cost K13<sup>C580Y</sup>+UBP1<sup>R3138H</sup> parasites (yellow) plotted against parasite survival in RSA. Grey dots show data of *k13*  
368 mutations from Figure 4D. All error bars show standard deviations.

369

370

## 371 Discussion

372 Based on our findings in this work we conclude that moderate-resistance mutations in *k13* may have  
373 been present in parasites from many African countries for several years. Due to their lower fitness  
374 cost, they may be favored in high malaria incidence settings due to high inter-parasite competition  
375 (high rate of multiple infections) and lower treatment rates in the infected population (34–36). Our  
376 findings therefore suggest that lowering malaria incidence through control measures may increase the  
377 risk for the development of higher level resistance, as previously proposed (27, 35, 43, 51, 52). The  
378 presence of low-resistance mutations in Sub-Saharan Africa also shows that resistance can occur at  
379 high malaria incidence. At the moderate mutation frequency, low resistance levels and remaining  
380 effective partner drugs this may not be immediately evident in patient care. However, it is crucial to  
381 closely monitor resistance mutations and treatment efficacy in Africa, especially during interventions  
382 that increase drug use to lower malaria incidence and may thus raise the equilibrium of resistance level  
383 that is stable in the parasite population.

384 ART resistance clearly correlated with K13 levels for all *k13* propeller domain-mutations tested,  
385 indicating that resistance is a function of K13 abundance. Hence, mutations that confer resistance likely  
386 destabilize K13. As artificially titrating K13 or KIC7 levels had a similar effect it can be inferred that this  
387 is due to a proportional reduction in endocytosis. The same effect on resistance was observed in a K13  
388 titration recently (15) and the role of K13 protein abundance in resistance is also supported by the  
389 finding that increasing levels of K13 C580Y reverts resistant parasite back to sensitive (7). Interestingly,  
390 for E252Q, which is located outside the propeller domain, protein levels were not reduced. While the  
391 protein level differences for such moderate resistance mutations are too small for rigorous  
392 conclusions, it is nevertheless tempting to speculate that this mutation reduced K13 activity rather  
393 than protein levels. Interestingly, K13<sup>C580Y-29<sup>th</sup></sup> parasites selected for higher resistance had even further  
394 reduced levels of K13 than K13<sup>C580Y</sup>, confirming that K13 protein levels are a central determinant of  
395 ART resistance. By what mechanism the K13<sup>C580Y-29<sup>th</sup></sup> strain achieved lower K13 levels (and hence  
396 higher resistance levels) is at present unclear but additional *k13* mutations were here excluded.

397 The finding that ART resistance correlated with fitness cost of the tested *k13* mutations agrees with a  
398 recent study looking at *k13* M579I, C580Y and R561H in several African strains including 3D7 although  
399 no such correlation was observed in the Asian strain Dd2 (18). It is unclear what caused these  
400 differences between African strains and Dd2. Nonetheless, it showed that the genetic background in  
401 which the mutations occur can influence the fitness cost and the resistance level (18, 31, 53). Many  
402 differences have been observed in ART resistant parasites compared with sensitive parasites (13, 16,  
403 54–59) and some of these might correspond to such changes in the background that alter the effect of  
404 K13 mutations, although some of these changes likely also are downstream effects of the resistance  
405 mechanism (30). The data presented here originates from a set of isogenic 3D7 parasites which differ  
406 only in the mutations studied. While this limits how confidently conclusions can be extrapolated to  
407 other parasite strains, it presents the advantage of separating effects caused by the studied mutations  
408 from effects of the genetic background. Due to its long presence in culture, 3D7 also avoids variations  
409 that may arise in more recently culture adapted lines that often show reduced growth levels and may  
410 still acquire further changes during continued culture to adapt for better growth in culture.



411 *k13* E252Q was previously observed to inflict a fitness cost that is smaller than that of *k13* C580Y,  
412 however, these experiments were not performed using parasites with isogenic backgrounds (47). Our  
413 results confirm this finding in an isogenic background. It should also be noted that the long duration  
414 of the competition experiments may permit the K13<sup>C580Y</sup>-29<sup>th</sup> to revert back to a state similar to the  
415 K13<sup>C580Y</sup> parasites, as the continuous RSA selection pressure was lifted in the competition assay.

416 We observed a disproportionately high fitness cost in parasites with the *ubp1* mutation conferring ART  
417 resistance. This is in agreement with the finding that lowering endocytosis by conditional inactivation  
418 or disruption of K13 compartment proteins impairs parasite growth (7). The small fitness cost of *k13*  
419 mutations compared to other K13 compartment proteins is likely due to its role in endocytosis in rings  
420 only (7). Our findings therefore highlight the unique property of K13 whereas resistance-conferring  
421 changes in KICs also affect endocytosis in later stage parasites, incurring a higher fitness cost and this  
422 is a likely reason why *k13* is the predominant gene mutated to cause ART resistance. Due to their high  
423 fitness cost, changes outside *k13* are less likely to arise and the resistance level, as observed with the  
424 few found in the field (50, 60, 61), is low.

425 A combination of the *ubp1* mutation, with C580Y in *k13*, did not lead to additive or synergistic  
426 resistance. The same was true in a recent study for coronin R100K and E107V combined with *k13* C580Y  
427 (11). Together with the high fitness cost of changes outside K13 indicated by this and previous work  
428 (7), it therefore at present does not seem likely that such combinations will lead to hyper-resistant  
429 parasites in the field.

430 Double mutations in *k13* could be envisaged to result in a less costly change for parasite fitness.  
431 However, surprisingly neither the combination of a *k13* mutation with moderate and one with high  
432 resistance nor two that each cause high resistance, increased resistance and were not even additive.  
433 This finding was consistent with similar protein levels of the double mutated *k13* to the single mutated  
434 version, indicating that at least in these combinations, multiple mutations do not further destabilize  
435 K13.

436 Taken together the findings in this work indicate that hyper-resistant parasites are not likely to arise  
437 with the K13-based mechanism unless the trade-off between nutrient acquisition and ART resistance  
438 (7, 30) is circumvented by other means. The repertoire of possible *k13* mutations resulting in different  
439 levels of the protein in the cell may provide the parasite with the option to adapt to the optimal fitness  
440 and resistance for a given endemic setting and this may explain why low and high transmission regions  
441 differ in the mutations observed.

442

443

## 444 Materials and Methods

### 445 Plasmid construction

446 The N-terminal SLI plasmid of K13, pSLI-N-GFP-2xFKBP-K13-loxP (40) was modified for the Kelch13  
447 mutant parasites as follows: the V520A mutation was obtained by amplifying the codon-changed  
448 synthesized version of *k13* with primers Kelch13\_codon\_ad\_fw and K13(V520A)\_mutant\_rv, as well as  
449 K13(V520A)\_mutant\_fw and Kelch\_codon\_adjust\_rv (all primers listed in Table S2). For the V589I  
450 mutation the primers Kelch13\_codon\_ad\_fw and K13(V589I)\_mutant\_rv, as well as  
451 K13(V589I)\_mutant\_fw and Kelch\_codon\_adjust\_rv and for the E612K mutation the primers  
452 Kelch13\_codon\_ad\_fw and K13(E612K)\_mutant\_rv, as well as K13(E612K)\_mutant\_fw and  
453 Kelch\_codon\_adjust\_rv were used. The respective two fragments were cloned into the pSLI-N-GFP-  
454 2xFKBP-K13-loxP via AvrII/StuI, resulting in the plasmid pSLI-N-GFP-2xFKBP-K13(V520A)-loxP, pSLI-N-  
455 GFP-2xFKBP-K13(V589I)-loxP and pSLI-N-GFP-2xFKBP-K13(E612K)-loxP.

456 For the mutation pool candidates the pSLI-TGD plasmid (40) was used. The homology region was  
457 directly linked to a synthesized functional codon-changed version of the corresponding candidate  
458 containing all selected mutations (Genscript). The fragments of the homology region and the mutated  
459 recodoned sequence of all candidates were cloned by Gibson assembly into the pSLI-TGD vector via  
460 NotI/MluI, resulting in the vectors pSLI-KiC1mutpool, pSLI-KiC2mutpool, pSLI-KiC4mutpool, pSLI-  
461 KiC5mutpool, pSLI-KiC7mutpool, pSLI-KiC9mutpool, pSLI-UBP1mutpool and pSLI-MyosinFmutpool.  
462 Sequencing was performed to confirm absence of undesired mutations.

463 To generate K13<sup>V520A+C580Y</sup>, pSLI-N-GFP-2xFKBP-K13-loxP (40) was modified by amplifying *k13* from this  
464 plasmid using primers HB21, HB09, HB10 and HB02 to introduce the mutation encoding V520A and  
465 ligating the resulting fragment into the same vector at the AvrII/XhoI sites.

466 K13<sup>R539T+C580Y</sup> was generated as above with primers HB21, HB80, HB81 and HB02. The *ubp1* R3138H  
467 mutation was introduced into K13<sup>C580Y</sup> parasites using a SLI2a plasmid based on the pSLI-3xHA plasmid  
468 (40) but containing *yDHODH* and *BSD* genes instead of Neomycin resistance gene and *hDHFR*  
469 respectively (62). The homology region was excised from the previously published *ubp1* R3138H  
470 plasmid (7) and ligated into the target plasmid using NotI and Sall. KIC4-TGD and KIC5-TGD plasmids  
471 were created by inserting the respective homology regions (7) into SLI2a plasmids (62).

#### 472 **Parasite culturing and transfection**

473 *P. falciparum* 3D7 parasites (63) were cultivated at 37°C in O+ erythrocytes in RPMI complete medium  
474 with 0.5% Albumax (Life Technologies) with 5% hematocrit and transfected as previously described  
475 (64, 65). Transgenic parasites were selected using 4 nM WR99210 (Jacobus Pharmaceuticals) or 2.5 µg-  
476 ml BSD (Invitrogen). For selection-linked integration, parasites were selected as previously described  
477 using 0.9 µM DSM1 (BEI resources) or 400 µg/ml G418 (Merck) (40). Correct integration was confirmed  
478 by PCR as described (40).

#### 479 ***In-vitro* ring-stage survival assay<sup>0-3h</sup> (RSA) and consecutive RSAs**

480 All RSAs were performed according to the standard procedure described previously (42). 0-3 h old rings  
481 were treated with 700 nM DHA for 6 h and cultivated for another 66 h at 37°C. Giemsa smears were  
482 taken and parasite survival rate determined by comparing the parasitemia of viable parasites after  
483 DHA against the parasitemia of the untreated control. Parasites were defined as resistant when mean  
484 survival rate exceeded the cut-off value of 1% (42).

485 For the consecutive RSA, K13<sup>C580Y</sup> parasites (7) were used. 66 h after the DHA pulse, Giemsa smears  
486 were taken and the surviving parasites of the DHA treated sample were re-cultivated in a new Petri  
487 dish. After sufficient parasitemia was reached, the parasites originating from the RSA survivors were  
488 subjected to a new RSA. This procedure was continuously repeated for 30 rounds. The *k13* gene of the  
489 resulting parasites K13<sup>C580Y</sup>-29<sup>th</sup> was sequenced and showed no changed compared to the starting cell  
490 line which harbored a recodoned *k13* with the C580Y mutation (7).

#### 491 **Fluorescence microscopy**

492 Microscopy was performed as described earlier (66). A Zeiss Axio Imager M1 or M2 provided with a  
493 Hamamatsu Orca C4742-95 camera was used for imaging. Zeiss Plan-apochromat 63x or 100x oil  
494 immersion objectives with 1.4 numerical aperture were used. Images were edited using Corel Photo  
495 Paint X8 and brightness and intensity were adjusted. Images that were used for quantification were  
496 not adjusted for brightness and intensity.

#### 497 **Measurement of protein amount by fluorescence intensity**

498 GFP-K13 parasites were synchronized two times using 5% sorbitol at intervals of two days. After the  
499 second sorbitol synchronization, the cell lines were cultivated at 37°C for 2 more hours and then GFP  
500 signal of the ring-stage parasites was detected by fluorescence microscopy using the 63x oil immersion  
501 objective. GFP-K13 WT parasites were always imaged alongside parasites carrying mutations and were  
502 used to normalize the signal of mutation-harboring parasites. Parasites were selected based on DIC  
503 and then exposed for 200 ms to image green fluorescence. Total intensity of the GFP signal in foci was  
504 measured and background signal subtracted using ImageJ (ImageJ2 2018, (67)).

#### 505 **Growth assessment**

506 The parasitemia of a mixed-stage parasite culture was measured by flow cytometry (40) and based on  
507 this the parasitemia was adjusted to 0.05 to 0.1% parasitemia in 2.5% hematocrit. The parasitemia was  
508 then measured again by flow cytometry to determine the start parasitemia. These parasites were  
509 cultivated for 96 h and the medium was changed every 24 h. After 96 h parasitemia was measured  
510 again by flow cytometry and divided by the starting parasitemia to obtain the fold change in  
511 parasitemia.

#### 512 **Competition assay**

513 Schizonts were isolated using 60% percoll purification, washed once with medium and cultured for 6  
514 hours to allow invasion of merozoites into new red blood cells. Remaining schizonts were removed by  
515 a 10-min incubation in 5% sorbitol solution. The resulting 0-6 h old parasites were cultured at 37°C for  
516 20-24 h after which the parasitemia was measured by flow cytometry (40). Based on the determined  
517 parasitemia, the mutant K13 cell lines were co-cultivated in a 1:1 ratio with 3D7 control in a 5 mL Petri  
518 dish. The proportion of GFP-positive parasites was assessed by fluorescence microscopy until one  
519 parasite line reached 95% of parasite proportion.

#### 520 **Statistical analysis and malaria incidence data**

521 Unpaired t-tests were performed and Pearson's *r* calculated using GraphPad Prism 9.0.2. Linear  
522 regressions were fit to log transformed data (GraphPad Prism). All error bars shown are standard  
523 deviations. Malaria incidence data was downloaded from [https://ghdx.healthdata.org/gbd-results-](https://ghdx.healthdata.org/gbd-results-tool)  
524 [tool](https://ghdx.healthdata.org/gbd-results-tool).

525

#### 526 **Acknowledgements**

527 We thank Jacobus Pharmaceuticals for supplying WR99210. DSM1 (MRA-1161) was received from  
528 MR4/BEI Resources, NIAID, NIH. We thank Birgit Förster for sequencing and Ralf Krumpkamp for  
529 helpful discussions. This research made use of PlasmoDB.org. H.M.B. acknowledges funding by the  
530 Ortrud Mührer Fellowship of the Vereinigung der Freunde des Tropeninstituts Hamburg e.V.. This  
531 study was in part funded by the German Center for Infection Research (TTU03.806). TS acknowledges  
532 funding by the European Research Council (ERC, grant 101021493).

#### 533 **Author contributions**

534 T.S., O.M.A and J.M. conceived the project. T.S. supervised research. S.Schm., H.M.B. and D.P.  
535 performed experiments. S.Schm. and H.M.B analyzed data and prepared figures. H.M.B. and T.S. wrote  
536 the manuscript draft. All authors approved the manuscript.

#### 537 **Competing interests**

538 The authors declare no competing interests.

539

## 540 References

- 541 1. Institute for Health Metrics and Evaluation (IHME), Global Burden of Disease Collaborative  
542 Network. Global Burden of Disease Study 2019 (GBD 2019) Results. (2021).
- 543 2. World Health Organization, *World malaria report 2021* (2021).
- 544 3. World Health Organization, *Report on antimalarial drug efficacy, resistance and response: 10*  
545 *years of surveillance (2010-2019)* (2020).
- 546 4. B. Witkowski, *et al.*, Novel phenotypic assays for the detection of artemisinin-resistant  
547 *Plasmodium falciparum* malaria in Cambodia: in-vitro and ex-vivo drug-response studies.  
548 *Lancet Infect Dis.* **13**, 1043–1049 (2013).
- 549 5. F. Ariey, *et al.*, A molecular marker of artemisinin-resistant *Plasmodium falciparum* malaria.  
550 *Nature* **505**, 50–55 (2014).
- 551 6. J. Straimer, *et al.*, K13-propeller mutations confer artemisinin resistance in *Plasmodium*  
552 *falciparum* clinical isolates. *Science.* **347**, 428–431 (2015).
- 553 7. J. Birnbaum, *et al.*, A Kelch13-defined endocytosis pathway mediates artemisinin resistance in  
554 malaria parasites. *Science.* **367**, 51–59 (2020).
- 555 8. N. V. Simwela, *et al.*, Experimentally Engineered Mutations in a Ubiquitin Hydrolase, UBP-1,  
556 Modulate In Vivo Susceptibility to Artemisinin and Chloroquine in *Plasmodium berghei*.  
557 *Antimicrob. Agents Chemother.* **64**, e02484-19 (2020).
- 558 9. R. C. Henrici, D. A. van Schalkwyk, C. J. Sutherland, Modification of pfap2 $\mu$  and pfubp1  
559 Markedly Reduces Ring- Stage Susceptibility of *Plasmodium falciparum* to Artemisinin In Vitro.  
560 *Antimicrob. Agents Chemother.* **64**, e01542-19 (2019).
- 561 10. A. R. Demas, *et al.*, Mutations in *Plasmodium falciparum* actin-binding protein coronin confer  
562 reduced artemisinin susceptibility. *Proc. Natl. Acad. Sci. U. S. A.* **115**, 12799–12804 (2018).
- 563 11. A. I. Sharma, *et al.*, Genetic background and PfKelch13 affect artemisinin susceptibility of  
564 PfCoronin mutants in *Plasmodium falciparum*. *PLoS Genet.* **16**, e1009266 (2020).
- 565 12. T. Yang, *et al.*, Decreased K13 Abundance Reduces Hemoglobin Catabolism and Proteotoxic  
566 Stress, Underpinning Artemisinin Resistance. *Cell Rep.* **29**, 2917-2928.e5 (2019).
- 567 13. N. F. Gnädig, *et al.*, Insights into the intracellular localization, protein associations and  
568 artemisinin resistance properties of *Plasmodium falciparum* K13. *PLoS Pathog.* **16**, e1008482  
569 (2020).
- 570 14. G. Siddiqui, A. Srivastava, A. S. Russell, D. J. Creek, Multi-omics based identification of specific  
571 biochemical changes associated with PfKelch13-mutant artemisinin-resistant *Plasmodium*  
572 *falciparum*. *J. Infect. Dis.* **215**, 1435–1444 (2017).
- 573 15. R. Schumann, *et al.*, Protein abundance and folding rather than the redox state of Kelch13  
574 determine the artemisinin susceptibility of *Plasmodium falciparum*. *Redox Biol.* **48**, 102177  
575 (2021).
- 576 16. A. Xiong, *et al.*, K13-Mediated Reduced Susceptibility to Artemisinin in *Plasmodium falciparum*  
577 Is Overlaid on a Trait of Enhanced DNA Damage Repair. *Cell Rep.* **32**, 107996 (2020).
- 578 17. D. Ménard, *et al.*, A worldwide map of *Plasmodium falciparum* K13-propeller polymorphisms.  
579 *N. Engl. J. Med.* **374**, 2453–2464 (2016).
- 580 18. B. H. Stokes, *et al.*, *Plasmodium falciparum* K13 mutations in Africa and Asia impact  
581 artemisinin resistance and parasite fitness. *Elife* **10**, e66277 (2021).

- 582 19. R. Amato, *et al.*, Genomic epidemiology of artemisinin resistant malaria. *Elife* **5**, e08714  
583 (2016).
- 584 20. O. Miotto, *et al.*, Genetic architecture of artemisinin-resistant *Plasmodium falciparum*. *Nat.*  
585 *Genet.* **47**, 226–234 (2015).
- 586 21. N. K. Kayiba, *et al.*, Spatial and molecular mapping of Pfkkelch13 gene polymorphism in Africa  
587 in the era of emerging *Plasmodium falciparum* resistance to artemisinin: a systematic review.  
588 *Lancet Infect. Dis.* **21**, e82–e92 (2021).
- 589 22. L. Ndwiga, *et al.*, A review of the frequencies of *Plasmodium falciparum* Kelch 13 artemisinin  
590 resistance mutations in Africa. *Int. J. Parasitol. Drugs Drug Resist.* **16**, 155–161 (2021).
- 591 23. B. Balikagala, *et al.*, Evidence of Artemisinin-Resistant Malaria in Africa. *N. Engl. J. Med.* **385**,  
592 1163–1171 (2021).
- 593 24. World Health Organization, “Artemisinin resistance and artemisinin-based combination  
594 therapy efficacy” (2019).
- 595 25. A. Uwimana, *et al.*, Emergence and clonal expansion of in vitro artemisinin-resistant  
596 *Plasmodium falciparum* kelch13 R561H mutant parasites in Rwanda. *Nat. Med.* **26**, 1602–1608  
597 (2020).
- 598 26. A. Uwimana, *et al.*, Association of *Plasmodium falciparum* kelch13 R561H genotypes with  
599 delayed parasite clearance in Rwanda: an open-label, single-arm, multicentre, therapeutic  
600 efficacy study. *Lancet Infect. Dis.* **21**, 1120–1128 (2021).
- 601 27. K. G.-P. S. WWARN, *et al.*, Clinical determinants of early parasitological response to ACTs in  
602 African patients with uncomplicated *falciparum* malaria: a literature review and meta-analysis  
603 of individual patient data. *BMC Med.* **13**, 212 (2015).
- 604 28. N. Scott, *et al.*, Implications of population-level immunity for the emergence of artemisinin-  
605 resistant malaria: a mathematical model. *Malar. J.* **17**, 279 (2018).
- 606 29. E. Y. Klein, D. L. Smith, R. Laxminarayan, S. Levin, Superinfection and the evolution of  
607 resistance to antimalarial drugs. *Proc. R. Soc. B Biol. Sci.* **279**, 3834–3842 (2012).
- 608 30. P. Mesén-Ramírez, *et al.*, The parasitophorous vacuole nutrient channel is critical for drug  
609 access in malaria parasites and modulates the artemisinin resistance fitness cost. *Cell Host*  
610 *Microbe* **29**, 1774-1787.e9 (2021).
- 611 31. S. Nair, *et al.*, Fitness Costs and the Rapid Spread of kelch13 -C580Y Substitutions Conferring  
612 Artemisinin Resistance. *Antimicrob. Agents Chemother.* **62**, e00605-18 (2018).
- 613 32. S. M. Taylor, *et al.*, Absence of putative artemisinin resistance mutations among *Plasmodium*  
614 *falciparum* in sub-Saharan Africa: A molecular epidemiologic study. *J. Infect. Dis.* **211**, 680–688  
615 (2015).
- 616 33. A. Ouattara, *et al.*, Polymorphisms in the K13-propeller gene in artemisinin-susceptible  
617 *Plasmodium falciparum* parasites from Bougoula-Hameau and Bandiagara, Mali. *Am. J. Trop.*  
618 *Med. Hyg.* **92**, 1202–1206 (2015).
- 619 34. P. C. Bull, K. Marsh, The role of antibodies to *Plasmodium falciparum*-infected-erythrocyte  
620 surface antigens in naturally acquired immunity to malaria. *Trends Microbiol.* **10**, 55–58  
621 (2002).
- 622 35. P. J. Rosenthal, The interplay between drug resistance and fitness in malaria parasites. *Mol.*  
623 *Microbiol.* **89**, 1025–1038 (2013).
- 624 36. F. J. I. Fowkes, P. Boeuf, J. G. Beeson, Immunity to malaria in an era of declining malaria



- 625 transmission. *Parasitology* **143**, 139–153 (2016).
- 626 37. WWARN K13 Genotype-Phenotype Study Group, Association of mutations in the Plasmodium  
627 falciparum Kelch13 gene (Pf3D7\_1343700) with parasite clearance rates after artemisinin-  
628 based treatments—a WWARN individual patient data meta-analysis. *BMC Med.* **17**, 1 (2019).
- 629 38. B. Hogan, *et al.*, Malaria Coinfections in Febrile Pediatric Inpatients: A Hospital-Based Study  
630 from Ghana. *Clin. Infect. Dis.* **66**, 1838–1845 (2018).
- 631 39. MalariaGEN, MalariaGen (2021) (March 23, 2022).
- 632 40. J. Birnbaum, *et al.*, A genetic system to study Plasmodium falciparum protein function. *Nat.*  
633 *Methods* **14**, 450–456 (2017).
- 634 41. C. E. Eboumbou Moukoko, *et al.*, K-13 propeller gene polymorphisms isolated between 2014  
635 and 2017 from Cameroonian Plasmodium falciparum malaria patients. *PLoS One* **14**,  
636 e0221895 (2019).
- 637 42. B. Witkowski, *et al.*, Novel phenotypic assays for the detection of artemisinin- resistant  
638 Plasmodium falciparum malaria in Cambodia: in-vitro and ex-vivo drug-response studies.  
639 *Lancet Infect Dis.* **13**, 1043–1049 (2013).
- 640 43. H. M. Behrens, S. Schmidt, T. Spielmann, The newly discovered role of endocytosis in  
641 artemisinin resistance. *Med. Res. Rev.* **41**, 2998–3022 (2021).
- 642 44. L. Paloque, *et al.*, Mutation in the Plasmodium falciparum BTB/POZ Domain of K13 Protein  
643 Confers Artemisinin Resistance. *Antimicrob. Agents Chemother.* **66**, e0132021 (2022).
- 644 45. M. Bushman, R. Antia, V. Udhayakumar, J. C. de Roode, Within-host competition can delay  
645 evolution of drug resistance in malaria. *PLOS Biol.* **16**, e2005712 (2018).
- 646 46. M. Legros, S. Bonhoeffer, A combined within-host and between-hosts modelling framework  
647 for the evolution of resistance to antimalarial drugs. *J. R. Soc. Interface* **13**, 20160148 (2016).
- 648 47. A. R. Tirrell, *et al.*, Pairwise growth competitions identify relative fitness relationships among  
649 artemisinin resistant Plasmodium falciparum field isolates. *Malar. J.* **18**, 295 (2019).
- 650 48. WWARN, Artemisinin Molecular Surveyor.
- 651 49. Institute for Health Metrics and Evaluation (IHME), Burden of Disease, Global Health Data  
652 exchange.
- 653 50. G. C. Cerqueira, *et al.*, Longitudinal genomic surveillance of Plasmodium falciparum malaria  
654 parasites reveals complex genomic architecture of emerging artemisinin resistance. *Genome*  
655 *Biol.* **18**, 78 (2017).
- 656 51. Y. D. Ndiaye, *et al.*, Genetic surveillance for monitoring the impact of drug use on Plasmodium  
657 falciparum populations. *Int. J. Parasitol. Drugs Drug Resist.* **17**, 12–22 (2021).
- 658 52. D. Menard, A. Dondorp, Antimalarial Drug Resistance: A Threat to Malaria Elimination. *Cold*  
659 *Spring Harb. Perspect. Med.* **7**, a025619 (2017).
- 660 53. J. Straimer, *et al.*, Plasmodium falciparum K13 Mutations Differentially Impact Ozone  
661 Susceptibility and Parasite Fitness In Vitro. *MBio* **8**, e00172-17 (2017).
- 662 54. S. Mok, *et al.*, Artemisinin-resistant K13 mutations rewire Plasmodium falciparum’s intra-  
663 erythrocytic metabolic program to enhance survival. *Nat. Commun.* **12**, 530 (2021).
- 664 55. S. Mok, *et al.*, Population transcriptomics of human malaria parasites reveals the mechanism  
665 of artemisinin resistance. *Science.* **347**, 431–435 (2015).

- 666 56. C. Dogovski, *et al.*, Targeting the Cell Stress Response of Plasmodium falciparum to Overcome  
667 Artemisinin Resistance. *PLOS Biol.* **13**, e1002132 (2015).
- 668 57. S. Bhattacharjee, *et al.*, Remodeling of the malaria parasite and host human red cell by vesicle  
669 amplification that induces artemisinin resistance. *Blood* **131**, 1234–1247 (2018).
- 670 58. M. Zhang, *et al.*, Inhibiting the Plasmodium eIF2 $\alpha$  Kinase PK4 Prevents Artemisinin-Induced  
671 Latency. *Cell Host Microbe* **22**, 766–776 (2017).
- 672 59. J. Gibbons, *et al.*, Altered expression of K13 disrupts DNA replication and repair in  
673 Plasmodium falciparum. *BMC Genomics* **19**, 849 (2018).
- 674 60. S. Borrmann, *et al.*, Genome-wide screen identifies new candidate genes associated with  
675 artemisinin susceptibility in Plasmodium falciparum in Kenya. *Sci. Rep.* **3**, 3318 (2013).
- 676 61. G. Henriques, *et al.*, Directional selection at the pfmdr1, pfcr1, pfubp1, and pfap2mu loci of  
677 Plasmodium falciparum in Kenyan children treated with ACT. *J. Infect. Dis.* **210**, 2001–2008  
678 (2014).
- 679 62. A. B. Soares, *et al.*, An unusual trafficking domain in MSRP6 defines a complex needed for  
680 Maurer’s clefts anchoring and maintenance in P. falciparum infected red blood cells. *bioRxiv*  
681 [*Preprint*], 2021.12.03.471078 (2021).
- 682 63. D. Walliker, *et al.*, Genetic analysis of the human malaria parasite Plasmodium falciparum.  
683 *Science.* **236**, 1661–1666 (1987).
- 684 64. W. Trager, J. Jensen, Human malaria parasites in continuous culture. *Science.* **193**, 673–675  
685 (1976).
- 686 65. R. W. Moon, *et al.*, Adaptation of the genetically tractable malaria pathogen Plasmodium  
687 knowlesi to continuous culture in human erythrocytes. *Proc. Natl. Acad. Sci.* **110**, 531–536  
688 (2013).
- 689 66. C. Grüning, *et al.*, Development and host cell modifications of Plasmodium falciparum blood  
690 stages in four dimensions. *Nat. Commun.* **2**, 165 (2011).
- 691 67. C. A. Schneider, W. S. Rasband, K. W. Eliceiri, NIH Image to ImageJ: 25 years of image analysis.  
692 *Nat. Methods* **9**, 671–675 (2012).
- 693
